# Supplementary material for: Interactions of a Water-Soluble Glycofullerene with Glucose Transporter 1. Analysis of the Cellular Effects on a Pancreatic Tumor Model
Source: MDPI journal article supplement (doi:10.3390/nano11020513), 2021-02-18
Supplement: s1 [file s1]

# **A WATER-SOLUBLE GLYCOFULLERENE INTERACTIONS WITH GLUCOSE TRANSPORTER 1. ANALYSIS OF THE CELLULAR EFFECTS ON PANCREATIC TUMOR MODEL**

Edyta Barańska<sup>1</sup>, Olga Wiecheć-Cudak<sup>1</sup>, Monika Rak<sup>1</sup>, Aleksandra Bienia<sup>1</sup>, Anna Mrozek-Wilczkiewicz<sup>2</sup>, Martyna Krzykawska-Serda\*<sup>1</sup> and Maciej Serda<sup>3</sup>

<sup>1</sup>*Faculty of Biochemistry, Biophysics and Biotechnology, Jagiellonian University, Kraków, Poland*

<sup>2</sup>*A. Chelkowski Institute of Physics and Silesian Centre for Education and Interdisciplinary Research, University of Silesia in Katowice, Chorzów, Poland*

<sup>3</sup>*Institute of Chemistry, University of Silesia in Katowice, Katowice, Poland*

\*email: [maciej.serda@us.edu.pl](mailto:maciej.serda@us.edu.pl); [martyna.krzykawska@uj.edu.pl](mailto:martyna.krzykawska@uj.edu.pl)

**WESTERN BLOTS FOR MMP-2, HIF-1 and HO-1 proteins**

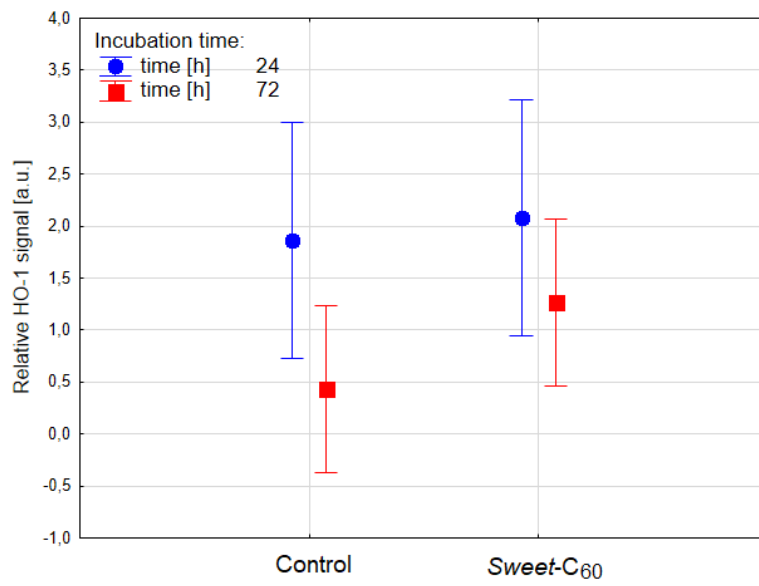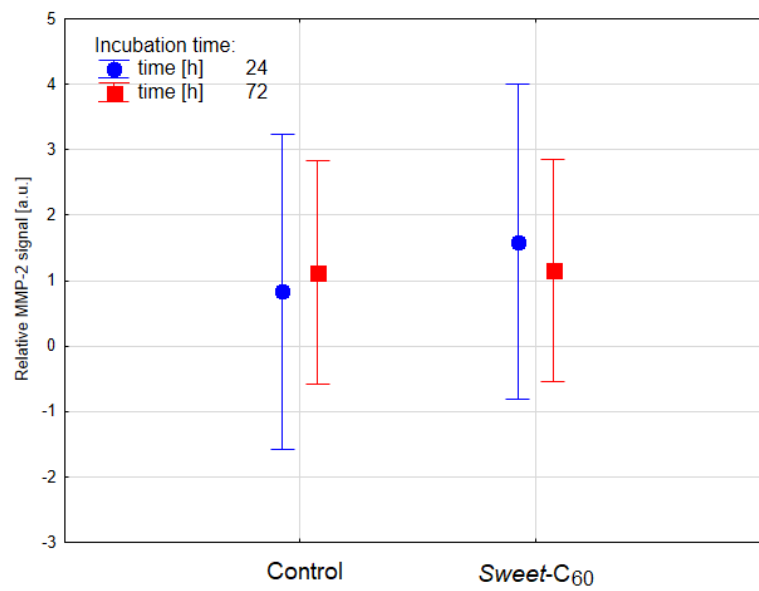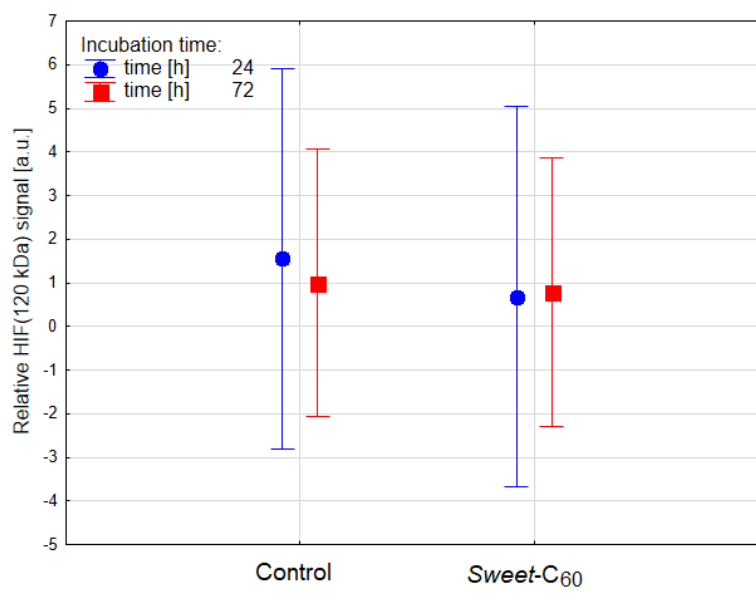

## Figure S1

The relative concentration of selected proteins (MMP-2, HIF-1 and HO-1) measured by Western Blot technique. Data points presents signal intensity divided by signal intensity from reference protein (GAPDH), vertical bars denote 95 % confidence intervals. The Panc-1 cells were incubated with Sweet-C60 for 24 or 72 hours at concentration 0 and 1 mg/mL.
